# Supplementary material for: Carnosic acid protects against doxorubicin-induced cardiotoxicity through enhancing the Nrf2/HO-1 pathway
Source: Royal Society of Chemistry journal article supplement (doi:10.1039/d2fo03904d), 2023-01-01
Supplement: d2fo03904d2.pdf [file d2fo03904d2.pdf]

## Supplemental Material

### Carnosic acid protects against Doxorubicin-induced cardiotoxicity through enhancing the Nrf2/HO-1 pathway

#### SUPPLEMENTARY INFORMATION

##### Materials and reagents

Carnosic acid(CA) was purchased from MedChemExpress (#HY-N0644, USA). The purity of Carnosic acid is  $\geq 99\%$ . Doxorubicin was also obtained from MedChemExpress (HY-15142A, USA). CA and DOX was dissolved in DMSO (Sigma, #D2650, USA.) at a concentration of 50 mmol L<sup>-1</sup> as a stock solution and the final DMSO concentration in the cell media was less than 0.1%.

Cell Counting Kit 8 (CCK-8) was purchased from Shanghai Beyotime Biotechnology (#C0037, China). Lactate dehydrogenase (LDH); creatine kinase isoenzymes (CK-MB); cardiac isoform of troponin T(cTnT) assay Kits were obtained from Nanjing Jiancheng Bioengineering Institute (#A020-2-2, #H197-1-1, #H149-2, China). DAPI was purchased from Servicebio(#GDP1024, China). Dihydroethidium (DHE), 2',7' -dichlorodihydro fluorescein diacetate (DCFH-DA) were purchased from Shanghai Beyotime Biotechnology (#S0033S, #S0063, China); Superoxide dismutase (SOD) detecting kits, Malondialdehyde (MDA) assay kit, glutathione peroxidase (GSH-Px) activity detecting kits were purchased from Nanjing Jiancheng Bioengineering Institute (#A001-1-1, #A003-1-1, #A005-1-1, China). Primary antibodies against Anti-Lamin B1, Anti-Histone H3 were obtained from Servicebio(#GB111802, #GB11102, China); Anti-B cell lymphoma 2 (BCL-2, #26593-1), anti-BCL-2-associated X protein (BAX, #50599-2), caspase3(#19677-1) and Caspase1(#22915-1) anti-glyceraldehyde 3-phosphate dehydrogenase (GAPDH, #10494-1) were purchased from Proteintech Group(Rosemont, USA). Heme oxygenase-1 (HO-1, #ab13243), NF-E2-related factor 2 (Nrf2, #ab92946), nucleotide-binding oligomerization domain-like receptor containing pyrin domain 3 (NLRP3, #ab264468), IL-1 $\beta$ (#ab283818), IL-18(#ab191860),  $\alpha$ -actinin (#ab108198) were all obtained from Abcam (Cambridge, UK). Nrf2 small interfering RNA (siRNA) and control siRNA were purchased from GenePharma (Shanghai, China). siRNA-Nrf2 sequence: Sense5'→3': GCAAGAAGCCAGAUACAAATT; anti-sense5'→3': UUUGUAUCUGGCUUCUUGCTT.

Table.1 Primer information for QPCR analysis of expression of target genes

| Gene | Species | Forward primer (5'→3') | Reverse primer (5'→3') |
|------|---------|------------------------|------------------------|
| Nrf2 | mouse   | ATGCTTGTGGCTTGACCT     | ACCTGTTCTCTGTTCTGCTG   |
| Nrf2 | rat     | CTGGGGAGCTTGGAGAGA     | GGGCAGTATGTTGGAGGTG    |

|       |       |                     |                     |
|-------|-------|---------------------|---------------------|
| NLRP3 | mouse | GACTGGCAAAAGGCTGTG  | AGTTTCTCCAAGGCTACCG |
| NLRP3 | rat   | TGTTGTCAGGATCTCGCA  | AGTGAAGTAAGGCCGGAAT |
| GAPDH | mouse | TGTTTCCTCGTCCCGTAGA | ATCTCCACTTTGCCACTGC |
| GAPDH | rat   | ATGGCTACAGCAACAGGGT | TTATGGGGTCTGGGATGG  |

Table 2 List of all abbreviations

| Full name                                                                         | Abbreviations |
|-----------------------------------------------------------------------------------|---------------|
| Doxorubicin                                                                       | DOX           |
| reactive oxygen species                                                           | ROS           |
| Food and Drug Administration                                                      | FDA           |
| Nuclear transcription factor erythroid 2-related factor 2                         | Nrf2          |
| heme oxygenase-1                                                                  | HO-1          |
| nucleotide-binding oligomerization domain-like receptor containing pyrin domain 3 | NLRP3         |
| interleukin1 $\beta$                                                              | IL-1 $\beta$  |
| interleukin18                                                                     | IL-18         |
| Carnosic acid (CA)                                                                |               |
| left ventricle fractional shortening                                              | LVFS          |
| left ventricle ejection fraction                                                  | LVEF          |
| LV end diastolic diameter                                                         | LVIDd         |
| LV systolic diameter                                                              | LVIDs         |
| LV end systolic volume                                                            | LVESV         |
| LV end diastolic volume                                                           | LVEDV         |
| Neonatal rat ventricular myocytes                                                 | NRVMs         |
| lactate dehydrogenase                                                             | LDH           |
| creatine kinase isoenzymes                                                        | CK-MB         |
| cardiac isoform of troponin T                                                     | cTnT          |
| superoxide dismutase                                                              | SOD           |
| malondialdehyde                                                                   | MDA           |
| glutathione peroxidase                                                            | GSH-px        |
